# Supplementary material for: High prevalence of potential molecular therapeutic targets in poorly differentiated thyroid carcinoma
Source: Research Square preprint supplement (doi:10.21203/rs.3.rs-7112785/v1), 2025-07-28
Supplement: Supplementary file 1 [file 7caa0cf5604c6027ee9e07be.xlsx]

## Sheet: Foglio1
Supplementary Table 1: List and characteristics of the different bioinformatic tools used for variant classification.
			Classification		References
Name	Website	Basis	Score	Prediction
Align GVGD	(http://agvgd.hci.utah.edu/agvgd_input.php)	Protein structure/function and evolutionary conservation	GVGD= Class C0, C15, C25, C35, C45, C55, or C65	C65: most likely C0: less likely.	Comprehensive statistical study of 452 BRCA1 missense substitutions with classification of eight recurrent substitutions as neutral (S V Tavtigian et al.,J Med Genet 2006;43:295–305. doi: 10.1136/jmg.2005.033878)
DANN	(https://varsome.com)	Contrast annotations of fixed/nearly fixed derived alleles in humans with simulated variants	0.01 - 0.99	near 1 = "damaging"	Quang D, Chen Y, Xie X. DANN: a deep learning approach for annotating the pathogenicity of genetic variants. Bioinformatics. 2015 Mar 1;31(5):761-3. doi: 10.1093/bioinformatics/btu703. Epub 2014 Oct 22. PMID: 25338716; PMCID: PMC4341060.
FATHMM-MKL	(https://fathmm.biocompute.org.uk)	Evolutionary Conservation	p-values range: 0 - 1	< 0.5= "benign" > 0.5= "deleterious"	Shihab HA, Rogers MF, Gough J, Mort M, Cooper DN, Day INM, Gaunt TR, Campbell C (2014). An Integrative Approach to Predicting the Functional Consequences of Non-coding and Coding Sequence Variation. Shihab HA, Gough J, Cooper DN, Stenson PD, Barker GLA, Edwards KJ, Day INM, Gaunt, TR. (2013). Predicting the Functional, Molecular and Phenotypic Consequences of Amino Acid Substitutions using Hidden…
Grantham	(https://ionreporter.thermofisher.com)	Evolutionary Conservation	0 - 215	0-50= "conservative" 51-100= "moderately conservative" 101-150= "moderately radical" ≥151 "radical"	Grantham R. Amino acid difference formula to help explain protein evolution. Science. 1974 Sep 6;185(4154):862-4. doi: 10.1126/science.185.4154.862. PMID: 4843792.
LRT	(https://sites.google.com/site/jpopgen/dbNSFP)	Evolutionary Conservation	0 - 1	Tolerated Unkown Damaging	Felsenstein J. Evolutionary trees from DNA sequences: a maximum likelihood approach. J Mol Evol. 1981;17(6):368-76. doi: 10.1007/BF01734359. PMID: 7288891. Phylogeny Estimation and Hypothesis Testing Using Maximum Likelihood John P. Huelsenbeck Keith A. Crandall Annual Review of Ecology and Systematics 1997 28:1, 437-466
Meta-RNN	(http://www.liulab.science/metarnn.html)	Integrate information from 28 high-level annotation scores (16 functional prediction scores including SIFT, Polyphen2_HDIV, Polyphen2_HVAR, MutationAssessor, PROVEAN, VEST4, M-CAP, REVEL, MutPred, MVP, PrimateAI, DEOGEN2, CADD, fathmm-XF, Eigen and GenoCanyon, 8 conservation scores including GERP, phyloP100way_vertebrate, phyloP30way_mammalian, phyloP17way_primate, phastCons100way_vertebrate, pha…	0 - 1	< 0.5 = "Toerated" > 0.5 = "Damaging"	Li C, Zhi D, Wang K, Liu X (2021) MetaRNN: Differentiating Rare Pathogenic and Rare Benign Missense SNVs and InDels Using Deep Learning. bioRxiv.https://doi.org/10.1101/2021.04.09.438706.
Mutation Assessor	(http://mutationassessor.org/r3)	Evolutionary Conservation	- 5.2 to 6.5	"Damaging" (Score - Min)/(Max-Min)= ≤ 0.65 "Tolerated" (Score - Min)/(Max-Min)= > 0.65	Reva B, Antipin Y, Sander C. Determinants of protein function revealed by combinatorial entropy optimization. Genome Biol. 2007;8(11):R232. doi: 10.1186/gb-2007-8-11-r232. PMID: 17976239; PMCID: PMC2258190. Boris Reva, Yevgeniy Antipin, Chris Sander, Predicting the functional impact of protein mutations: application to cancer genomics, Nucleic Acids Research, Volume 39, Issue 17, 1 September 2011…
Mutation Taster	(https://www.mutationtaster.org)	Protein structure/function and evolutionary conservation	0.0-2.15 (does not affect forecast)	"disease causing" "disease causing automatic" "polymorphism" "polymorphism automatic"	Schwarz, J., Cooper, D., Schuelke et al. MutationTaster2: mutation prediction for the deep-sequencing age. Nat Methods 11, 361–362 (2014). https://doi.org/10.1038/nmeth.2890; J5Schwarz, J., Rödelsperger, C., Schuelke, M. et al. MutationTaster evaluates disease-causing potential of sequence alterations. Nat Methods 7, 575–576 (2010). https://doi.org/10.1038/nmeth0810-575; Mutation Taster 2021 ,Rob…
MutPred	(http://mutpred.mutdb.org)	Evolutionary Conservation	0-1	≥ 0.5 "Damaging" < 0.5 "Benign"	Pejaver V, Urresti J, Lugo-Martinez J, Pagel KA, Lin GN, Nam H, Mort M, Cooper DN, Sebat J, Iakoucheva LM, Mooney SD, Radivojac P. Inferring the molecular and phenotypic impact of amino acid variants with MutPred2. Nat. Commun. 11, 5918 (2020)
Polyphen 2	(https://ionreporter.thermofisher.com)	Evolutionary Conservation/ protein structure/function	Two models: HumDiv: 0.00 - 1 HumVar: 0.00 - 1	0.0 - 0.15= "benign" 0.15 - 0.85= "possibily damaging" 0.85 - 1.0= "probably damaging"	Adzhubei IA, Schmidt S, Peshkin L, Ramensky VE, Gerasimova A, Bork P, Kondrashov AS, Sunyaev SR. A method and server for predicting damaging missense mutations. Nat Methods. 2010 Apr;7(4):248-9. doi: 10.1038/nmeth0410-248. PMID: 20354512; PMCID: PMC2855889.
Provean	(http://provean.jcvi.org)	Evolutionary conservation/Allignment and mesurement of similarity between variant sequence and protein sequence homolog	-40 -12.5 (threshold: -2.5)	≥ -2.5= "Deleterious" ≤ -2.5= "Neutral"	Yongwook Choi, Agnes P. Chan, PROVEAN web server: a tool to predict the functional effect of amino acid substitutions and indels, Bioinformatics, Volume 31, Issue 16, 15 August 2015, Pages 2745–2747, https://doi.org/10.1093/bioinformatics/btv195 Predicting the Functional Effect of Amino Acid Substitutions and Indels Choi Y, Sims GE, Murphy S, Miller JR, Chan AP (2012) Predicting the Functional Ef…
REVEL	(https://labworm.com/tool/revel)	Ensemble method for predicting the pathogenicity of missense variants based on a combination of scores from 13 individual tools: MutPred, FATHMM v2.3, VEST 3.0, PolyPhen-2, SIFT, PROVEAN, MutationAssessor, MutationTaster, LRT, GERP++, SiPhy, phyloP, and phastCons	From 0 to 1	≥ 0.5= "Deleterious" ≤ 0.5= "Neutral"	Ioannidis NM,* Rothstein JH,* Pejaver V, Middha S, McDonnell SK, Baheti S, Musolf A, Li Q, Holzinger E, Karyadi D, Cannon-Albright LA, Teerlink CC, Stanford JL, Isaacs WB, Xu J, Cooney KA, Lange EM, Schleutker J, Carpten JD, Powell IJ, Cussenot O, Cancel-Tassin G, Giles GG, MacInnis RJ, Maier C, Hsieh CL, Wiklund F, Catalona WJ, Foulkes WD, Mandal D, Eeles RA, Kote-Jarai Z, Bustamante CD, Schaid …
SIFT	(https://sift.bii.a-star.edu.sg)	Evolutionary Conservation	0.00 - 1	< 0.05= "Damaging" > 0.05= "Tolerated"	1) Ng PC, Henikoff S. Predicting deleterious amino acid substitutions. Genome Res. 2001 May;11(5):863-74. doi: 10.1101/gr.176601. PMID: 11337480; PMCID: PMC311071. 2) Ng PC, Henikoff S. Accounting for human polymorphisms predicted to affect protein function. Genome Res. 2002 Mar;12(3):436-46. doi: 10.1101/gr.212802. PMID: 11875032; PMCID: PMC155281. 3) Ng PC, Henikoff S. SIFT: Predicting amino ac…
