# Supplementary material for: High prevalence of potential molecular therapeutic targets in poorly differentiated thyroid carcinoma
Source: Research Square preprint supplement (doi:10.21203/rs.3.rs-7112785/v1), 2025-07-28
Supplement: Supplementary file 2 [file dd278dfa25438d3319b10e2a.xlsx]

## Sheet: Foglio1
Supplementary Table 2. Molecular data obtained in NGS analysis using OCAv3 panel.
ID		Histological component	Gene	Exon	Amino Acid Change	Coding	Allelic Frequency %	Variant Effect	Significance	Fusion			CNV
										Chromosomic position	Fusion	Variant ID
PDTC_	E	PDTC	MET	15	p.His1097Arg	c.3290A>G	40.49	missense	Damaging	F			N
			NF2	11	p.Arg351Cys	c.1051C>T	9.35	missense	Damaging
			FGFR1	9	p.Thr371Met	c.1112C>T	15.97	missense	Damaging
			NOTCH1	34	p.Arg2313Trp	c.6937C>T	17.82	missense	Damaging
			NF1	18	p.Arg711Cys	c.2131C>T	15.79	missense	Damaging
PDTC_	F	PDTC	NRAS	3	p.Gln61Arg	c.182A>G	29.39	missense	Damaging	F			N
			PIK3CA	5	p.Asn345Lys	c.1035T>A	16.22	missense	Damaging
			NOTCH1	9	p.Pro498Arg	c.1493C>G	18.07	missense	Damaging
PDTC_	L	PDTC	CREBBP	2	p.?	c.86-1G>T	10.5	unknown	Damaging	F			N
			BRAF	17	p.Glu703Lys	c.2107G>A	9.28	missense	Damaging
			MSH2	4	p.Glu262Gly	c.785A>G	19.63	missense	Damaging
			TP53	10	p.Arg333LeufsTer12	c.998delG	81.49	frameshiftDeletion	Damaging
PDTC_	M	PDTC	NBN	6	p.Gly224Glu	c.671G>A	49.47	missense	Damaging	F			N
			PIK3CA	10	p.Glu545Lys	c.1633G>A	24.79	missense	Damaging
			NRAS	3	p.Gln61Arg	c.182A>G	43.4	missense	Damaging
PDTC_	Q	PDTC	SF3B1	14	p.Trp658Cys	c.1974G>T	45.47	missense	Damaging	F			N
PDTC_	R	PDTC	NRAS	3	p.Gln61Arg	c.182A>G	30.6	missense	Damaging	F			N
			PDGFRA	18	p.Gln828Arg	c.2483A>G	49.9	missense	Damaging
PDTC_	T	PDTC	NRAS	3	p.Gln61Lys	c.181C>A	21.38	missense	Damaging	F			N
PDTC_	V	PDTC	TERT		p.?	c.-124C>T	69.23	unknown	Damaging	F			N
			NRAS	3	p.Gln61Lys	c.181C>A	45.59	missense	Damaging
			ATM	44	p.Gln2133Ter	c.6397C>T	92.52	nonsense	Damaging
PDTC_	B1	PDTC	CDKN2A	1	p.Leu32_Leu37del	c.86_103delGGGCGCTGCTGGAGGCGG	9.8	nonframeshiftDeletion	Damaging	F			N
			MLH1	2	p.Gly67Arg	c.199G>A	34.89	missense	Damaging
			FGFR1	15	p.Ala676Thr	c.2026G>A	7.31	missense	Damaging
PDTC_	C1	PDTC	ARID1A	11	p.Gly1037Arg	c.3109G>C	48.7	missense	Damaging	F			N
PDTC_	I1	PDTC	FGFR2	9	p.Phe386Leu	c.1158C>A	44	missense	Damaging	F			N
			NRAS	2	p.Gly13Arg	c.37G>C	36.1	missense	Damaging
			RET	11	p.Arg635Cys	c.1903C>T	5.22	missense	Damaging
PDTC_	L1	PDTC	TERT		p.?	c.-124C>T	20	unknown	Damaging	F			N
PDTC_	P1	PDTC	TERT		p.?	c.-124C>T	69.12	unknown	Damaging	F			N
			NRAS	3	p.Gln61Lys	c.181C>A	41	missense	Damaging
			ATM	44	p.Gln2133Ter	c.6397C>T	93.14	nonsense	Damaging
PDTC_	Q1	PDTC	FGFR1	15	p.?	c.2070+1G>A	6.89	unknown	Damaging	F			N
			EGFR	22	p.Asp896Asn	c.2686G>A	40.57	missense	Damaging
			FANCD2	25	p.Arg794Ter	c.2380C>T	32	nonsense	Damaging
			DDR2	5	p.Asp125Asn	c.373G>A	30.1	missense	Damaging
			RAF1	7	p.Ser257Leu	c.770C>T	28.51	missense	Damaging
			NTRK2	4	p.Ala31Thr	c.91G>A	26.36	missense	Damaging
			NOTCH3	11	p.Arg587Cys	c.1759C>T	26.32	missense	Damaging
			BAP1	8	p.Arg208Trp	c.622C>T	24.91	missense	Damaging
			ATM	30	p.Arg1489Cys	c.4465C>T	23.11	missense	Damaging
			TP53	6	p.Arg213Trp	c.637_639delCGAinsTGG	22.22	missense	Damaging
			NOTCH3	9	p.Gly481Ser	c.1441G>A	21.86	missense	Damaging
			PIK3R1	15	p.Ser651Asn	c.1952G>A	20.38	missense	Damaging
			MDM2	11	p.Asp364Asn	c.1090G>A	20.35	missense	Damaging
PDTC_	S1	PDTC	TERT		p.?	c.-124C>T	26.67	unknown	Damaging	F			N
PDTC_	Z1	PDTC	TP53	6	p.Gly199Glu	c.596G>A	47.85	missense	Damaging	F			N
			ATR	42	p.Arg2356Cys	c.7066C>T	11.15	missense	Damaging
			NF1	30	p.Gln1336Ter	c.4006C>T	69.19	nonsense	Damaging
PDTC_	D2	PDTC	NO MUTATION DETECTED							F			N
PDTC_	E2	PDTC	NF1	45	p.?	c.6819+2T>A	67.61		Damaging	F			N
			PDGFRB	19	p.Thr881Ile	c.2642C>T	23.95	missense	Damaging
			EGFR	23	p.Trp905LeufsTer12	c.2709_2710delTGinsCGT	99.54	frameshiftBlockSubstitution	Damaging
			TP53	5	p.Arg158His	c.473G>A	69.39	missense	Damaging
			PTEN	4	p.Val85Phe	c.253G>T	65.95	missense	Damaging
			BAP1	13	p.Pro488Leu	c.1463C>T	8.61	missense	Damaging
			TSC2	15	p.Arg505Ter	c.1513C>T	37.4	nonsense	Damaging
PDTC_	L2	PDTC	TP53	7	p.Pro250HisfsTer10	c.748_758delCCCATCCTCAC	21.33	frameshiftDeletion	Damaging	F			N
PDTC_	N2	PDTC	TSC2	7	p.?	c.648+1G>A	8.94	unknown	Damaging	F			N
			MET	2	p.Ala320Thr	c.958G>A	31.34	missense	Damaging
			NRAS	3	p.Gln61Arg	c.182A>G	29.27	missense	Damaging
			PIK3CA	5	p.Val344Met	c.1030G>A	27.2	missense	Damaging
			JAK1	15	p.Arg681Trp	c.2041C>T	21.33	missense	Damaging
			RAD51	8	p.Arg236Ter	c.706C>T	21.18	nonsense	Damaging
			AXL	7	p.Thr328Met	c.983C>T	21.07	missense	Damaging
			ARID1A	20	p.Arg1722Ter	c.5164C>T	20.72	nonsense	Damaging
PDTC_	P2	PDTC	TERT		p.?	c.-124C>T	63.56	unknown	Damaging	F			N
PDTC_	R2	PDTC	PIK3CA	21	p.His1047Arg	c.3140A>G	46.4	missense	Damaging	F			N
			BRAF	15	p.Lys601Glu	c.1801A>G	47	missense	Damaging
PDTC_	A	PDTC	NFE2L2	2	p.Thr80Arg	c.239C>G	30.15	missense	Damaging	N			N
			KIT	16	p.Asp760Val	c.2279A>T	42.25	missense	Damaging
PDTC_	C	PDTC	TERT		p.?	c.-124C>T	26.67	unknown	Damaging	N			N
PDTC_	D	PDTC	TERT		p.?	c.-146C>T	37.93	unknown	Damaging	N			N
			PTEN	7	p.?	c.801+2T>A	22,5	unknown	Damaging
			PTEN	5	p.Asp92His	c.274G>C	42.14	missense	Damaging
			MAP2K1	3	p.Pro124Leu	c.371C>T	10.45	missense	Damaging
			IDH1	4	p.Arg132His	c.395G>A	9.48	missense	Damaging
			MTOR	44	p.Arg2018Ter	c.6052C>T	7.99	nonsense	Damaging
			NOTCH3	19	p.Arg1031Cys	c.3091C>T	10.79	missense	Damaging
			CCND3	2	p.Arg114Cys	c.340C>T	13.95	missense	Damaging
			SMARCA4	32	p.Arg1511Cys	c.4531C>T	12.11	missense	Damaging
			MSH2	12	p.Asn653Ser	c.1958A>G	6.23	missense	Damaging
			PDGFRA	12	p.Arg558Cys	c.1672C>T	16.95	missense	Damaging
			RET	17	p.Arg959Gln	c.2876G>A	13.52	missense	Damaging
			RET	12	p.Arg721Gln	c.2162G>A	11.07	missense	Damaging
PDTC_	G	PDTC	SMAD4	12	p.Arg531Leu	c.1592G>T	21.46	missense	Damaging	N			N
PDTC_	H	PDTC	CDKN2B	2	p.Thr95Met	c.284C>T	28.30	missense	Damaging	N			N
PDTC_	I	PDTC	TP53	5	p.Ser127Phe	c.380C>T	62.79	missense	Damaging	N			N
PDTC_	P	PDTC	NTRK2	19	p.Arg715Gln	c.2144G>A	8.93	missense	Damaging	N			N
			FANCI	26	p.Arg944LysfsTer28	c.2830_2831insA	38.2	frameshiftInsertion	Damaging
			SF3B1	15	p.Lys700Glu	c.2098A>G	21.6	missense	Damaging
			MSH6	4	p.Arg732Gln	c.2195G>A	6.66	missense	Damaging
			MSH6	4	p.Arg1005Gln	c.3014G>A	7.25	missense	Damaging
			CDKN2B	2	p.Thr95Met	c.284C>T	17.29	missense	Damaging
			TSC2	11	p.Glu366Lys	c.1096G>A	7.07	missense	Damaging
PDTC_	U	PDTC	NRAS	3	p.Gln61Arg	c.182A>G	46.41	missense	Damaging	N			N
			BAP1	13	p.Pro488Leu	c.1463C>T	8.38	missense	Damaging
PDTC_	Z	PDTC	POLE	47	p.Gln2184Ter	c.6550C>T	49.26	nonsense	Damaging	N			N
			AKT2	4	p.Val83_Ile84insGlyCysLeuGlnTrpThrThrVal	c.249_250insGGCTGCCTGCAGTGGACCACAGTC	16.33	nonframeshiftInsertion	Damaging
PDTC_	E1	PDTC	NRAS	3	p.Gln61Arg	c.182A>G	50.39	missense	Damaging	chr10:61665880 -chr10:43612032	CCDC6(1)-RET(12)	CCDC6-RET.C1R12.COSF1271	N
			BAP1	13	p.Pro488Leu	c.1463C>T	5.14	missense	Damaging
PDTC_	F1	PDTC	NRAS	3	p.Gln61Arg	c.182A>G	39.15	missense	Damaging	N			N
PDTC_	G1	PDTC	PDGFRB	19	p.Thr881Ile	c.2642C>T	19.78	missense	Damaging	N			N
			BRAF	11	p.Gly469Ala	c.1406G>C	45.86	missense	Damaging
			BAP1	13	p.Pro488Leu	c.1463C>T	6.4	missense	Damaging
			FGFR4	7	p.Ala257Thr	c.769G>A	51.91	missense	Damaging
PDTC_	M1	PDTC	NO MUTATION DETECTED							N			N
PDTC_	N1	PDTC	MSH2	7	p.Ala391ValfsTer18	c.1172_1181delCCAAGAAGTT	57.01	frameshiftDeletion	Damaging	N			N
			NOTCH1	23	p.Arg1279Cys	c.3835C>T	16.73	missense	Damaging
			PTEN	5	p.Arg130Ter	c.388C>T	60.76	nonsense	Damaging
			ATM	46	p.Glu2245MetfsTer3	c.6729_6730delAA	60.17	frameshiftDeletion	Damaging
			TP53	6	p.Arg213Ter	c.637C>T	60.51	nonsense	Damaging
			NF1	46	p.Tyr2285ThrfsTer5	c.6852_6855delTTAC	69.89	frameshiftDeletion	Damaging
PDTC_	O1	PDTC	PTEN	9	p.?	c.1027-1G>A	49.61	unknown	Damaging	N			N
			ATM	62	p.Trp2960Cys	c.8880G>C	11.06	missense	Damaging
			TP53	8	p.Glu285Lys	c.853G>A	8.85	missense	Damaging
PDTC_	R1	PDTC	NOTCH3	23	p.Glu1251Ter	c.3751G>T	51.54	nonsense	Damaging	N			N
PDTC_	T1	PDTC	TERT		p.?	c.-124C>T	16.67	unknown	Damaging	N			N
			SLX4	13	p.Glu1577AsnfsTer17	c.4729delG	24.5	frameshiftDeletion	Damaging
			NF1	18	p.Arg711Cys	c.2131C>T	17.33	missense	Damaging
PDTC_	U1	PDTC	ATM	19	p.?	c.2921+1G>A	14.41	unknown	Damaging	N			N
			CREBBP	6	p.Gly489Arg	c.1465G>A	24.92	missense	Damaging
			MSH6	4	p.Arg772Trp	c.2314C>T	23.38	missense	Damaging
			ATRX	7	p.Ile196Leu	c.586A>C	22.78	missense	Damaging
			MLH1	19	p.Trp712Ter	c.2135G>A	12.52	nonsense	Damaging
PDTC_	V1	PDTC	ERBB3	7	p.?	c.874+1G>A	10.77	unknown	Damaging	N			N
			PTEN	5	p.Arg130Ter	c.388C>T	59.12	nonsense	Damaging
			TP53	5	p.Arg175His	c.524G>A	54.37	missense	Damaging
PDTC_	A2	PDTC	TERT		p.?	c.-124C>T	45.16	unknown	Damaging	N			N
			NRAS	3	p.Gln61Lys	c.181C>A	44.8	missense	Damaging
PDTC_	B2	PDTC	ERBB2	22	p.Arg897Trp	c.2689C>T	46.66	missense	Damaging	N			N
			ARID1A	20	p.Leu2125Arg	c.6374T>G	36.33	missense	Damaging
			NRAS	2	p.Gly12Val	c.35G>T	25.86	missense	Damaging
PDTC_	C2	PDTC	ALK	25	p.Thr1258Ile	c.3773C>T	15.98	missense	Damaging	N			N
			NOTCH3	4	p.His130Tyr	c.388C>T	15.57	missense	Damaging
			TSC1	6	p.Thr138Ile	c.413C>T	15.27	missense	Damaging
			HRAS	4	p.Pro110Leu	c.329C>T	14.48	missense	Damaging
			EGFR	20	p.Val774Met	c.2320G>A	13.87	missense	Damaging
			MDM4	11	p.Gln305Ter	c.913C>T	13.61	nonsense	Damaging
			SMARCA4	12	p.Ser610Asn	c.1829G>A	13.57	missense	Damaging
			ATR	40	p.Ser2272Leu	c.6815C>T	13.57	missense	Damaging
			MLH1	17	p.Ala661Val	c.1982C>T	27.65	missense	Damaging
PDTC_	F2	PDTC	ATR	26	p.Lys1523Ile	c.4568A>T	45.22	missense	Damaging	N			N
			PTEN	8	p.Thr319LysfsTer24	c.956_959delCTTT	51.07	frameshiftDeletion	Damaging
			TP53	7	p.Arg248Gln	c.743G>A	44.46	missense	Damaging
			PTCH1	23	p.Val1377Met	c.4129G>A	78.14	missense	Damaging
			NF1	9	p.Glu318LysfsTer11	c.952_953delGA	53.9	frameshiftDeletion	Damaging
PDTC_	H2	PDTC	TP53	8	p.Arg282Trp	c.844C>T	49.47	missense	Damaging	N			N
			CDKN2B	2	p.Thr95Met	c.284C>T	22.51	missense	Damaging
PDTC_	I2	PDTC	MDM2	10	p?	c.918+1G>A	47.44	unknown	Damaging	N			N
			BAP1	13	p.Pro488Leu	c.1463C>T	6.8	missense	Damaging
			PDGFRB	19	p.Thr881Ile	c.2642C>T	24.55	missense	Damaging
PDTC_	M2	PDTC	NO MUTATION DETECTED							N			N
PDTC_	O2	PDTC	TERT		p.?	c.-124C>T	63.56	unknown	Damaging	N			N
			PTEN	5	p.Arg130Leu	c.389G>T	91.6	missense	Damaging
			PMS2	8	p.Asp286Gly	c.857A>G	46.76	missense	Damaging
			ATM	52	p.His2554Arg	c.7661A>G	90.67	missense	Damaging
PDTC_	Q2	PDTC	RB1	24	p.?	c.2520+1_2520+4delGTGA	45.86	unknown	Damaging	N			N
			TP53	5	p.Tyr126Cys	c.377A>G	50.44	missense	Damaging
			MLH1	19	p.Lys751SerfsTer3	c.2252_2253delAA	73.02	frameshiftDeletion	Damaging
			PTEN	8	p.Thr319Ter	c.955_958delACTT	43.76	nonsense	Damaging
			SLX4	11	p.Asp742Ala	c.2225A>C	17.22	missense	Damaging
			NOTCH3	4	p.Arg163Trp	c.487C>T	23.54	missense	Damaging
PDTC_	S2	PDTC	NOTCH1	31	p.Asp1912Asn	c.5734G>A	6.9	missense	Damaging	N			N
			MTOR	43	p.Thr1984Met	c.5951C>T	7.31	missense	Damaging
			TSC1	7	p.Arg204Cys	c.610C>T	5.64	missense	Damaging
			NTRK2	11	p.Gly344Ser	c.1030G>A	6	missense	Damaging
			SETD2	3	p.Arg1335Cys	c.4003C>T	6.6	missense	Damaging
			POLE	29	p.Arg1160His	c.3479G>A	6.31	missense	Damaging
			NF2	11	p.Arg341Gln	c.1022G>A	5.88	missense	Damaging
			MSH6	4	p.Glu995Lys	c.2983G>A	6.54	missense	Damaging
			ATR	28	p.Arg1653Ter	c.4957C>T	7.59	nonsense	Damaging
			PDGFRA	21	p.Pro937Leu	c.2810C>T	7.8	missense	Damaging
			DDR2	5	p.Arg133Gln	c.398G>A	7.01	missense	Damaging
			ARID1A	20	p.Arg1721Ter	c.5161C>T	7.55	nonsense	Damaging
			MSH6	2	p.Arg128His	c.383G>A	11.9	missense	Damaging
			SMARCA4	20	p.Arg978Gln	c.2933G>A	7.68	missense	Damaging
			NF1	21	p.Trp837LeufsTer37	c.2510_2522delGGATCAACATGAC	60.06	frameshiftDeletion	Damaging
			MAP2K1	6	p.Arg201His	c.602G>A	8.12	missense	Damaging
			TP53	5	p.Arg175His	c.524G>A	48.61	missense	Damaging
			NOTCH3	19	p.Arg1036Ter	c.3106C>T	10.11	nonsense	Damaging
			PTCH1	22	p.Thr1229Met	c.3686C>T	11.33	missense	Damaging
			ERBB2	23	p.Asp924Asn	c.2770G>A	10.93	missense	Damaging
			PDGFRB	13	p.Thr628Met	c.1883C>T	8.85	missense	Damaging
			NOTCH1	25	p.Arg1350Cys	c.4048C>T	9	missense	Damaging
			NF1	18	p.Arg711Cys	c.2131C>T	19.33	missense	Damaging
			MSH2	13	p,Phe694LeufsTer16	c.2082delT	68.57	frameshiftDeletion	Damaging
			JAK3	15	p.Arg651Trp	c.1951C>T	17.24	missense	Damaging
			FANCA	30	p.Ala980Val	c.2939C>T	10.09	missense	Damaging
PDTC_	A3	PDTC	NO DNA							N			N
PDTC_	B3	PDTC	NO DNA							N			N
PDTC_	D3	PDTC	NO DNA							N			N
PDTC_	F3	PDTC	NO DNA							N			N
PDTC_	G3	PDTC	NO DNA							N			N
PDTC_	L3	PDTC	NO DNA							N			N
PDTC_	M3	PDTC	NO DNA							N			N
PDTC_	N3	PDTC	NO DNA							N			N
PDTC_	O3	PDTC	NO DNA							chr3:176914909 - chr3:178916538	TBL1XR1(1) - PIK3CA(2)	TBL1XR1-PIK3CA.T1P2	N
PDTC_	P3	PDTC	NO DNA							N			N
PDTC_	Q3	PDTC	NO DNA							chr2:113992971 -chr3:12421203	PAX8(9) - PPARG(2)	PAX8-PPARG.P9P2.COSF1217	N
PDTC_	S3	PDTC	NO DNA							chr3:176914909 - chr3:178916538	TBL1XR1(1) - PIK3CA(2)	TBL1XR1-PIK3CA.T1P2	N
PDTC_	U3	PDTC	NO DNA							N			N
